# Supplementary material for: Fine-scale fluctuations of PM 1 , PM 2.5 , PM 10 and SO 2 concentrations caused by a prolonged volcanic eruption (Fagradalsfjall 2021, Iceland)
Source: Copernicus journal article supplement (doi:10.5194/acp-26-313-2026), 2026-01-07

Probability (%) of ground-level SO<sub>2</sub> concentrations exceeding 350 µg/m<sup>3</sup> air quality threshold during the 2021 Fagradalsfjall eruption as simulated by the Icelandic Meteorological Office CALPUFF model.

Note that the areas which are shown as colourless still have an above-zero probability of elevated SO<sub>2</sub> at ground level.

### Probability (%)

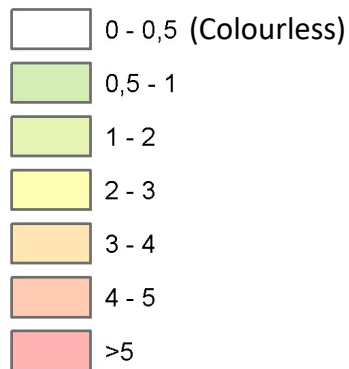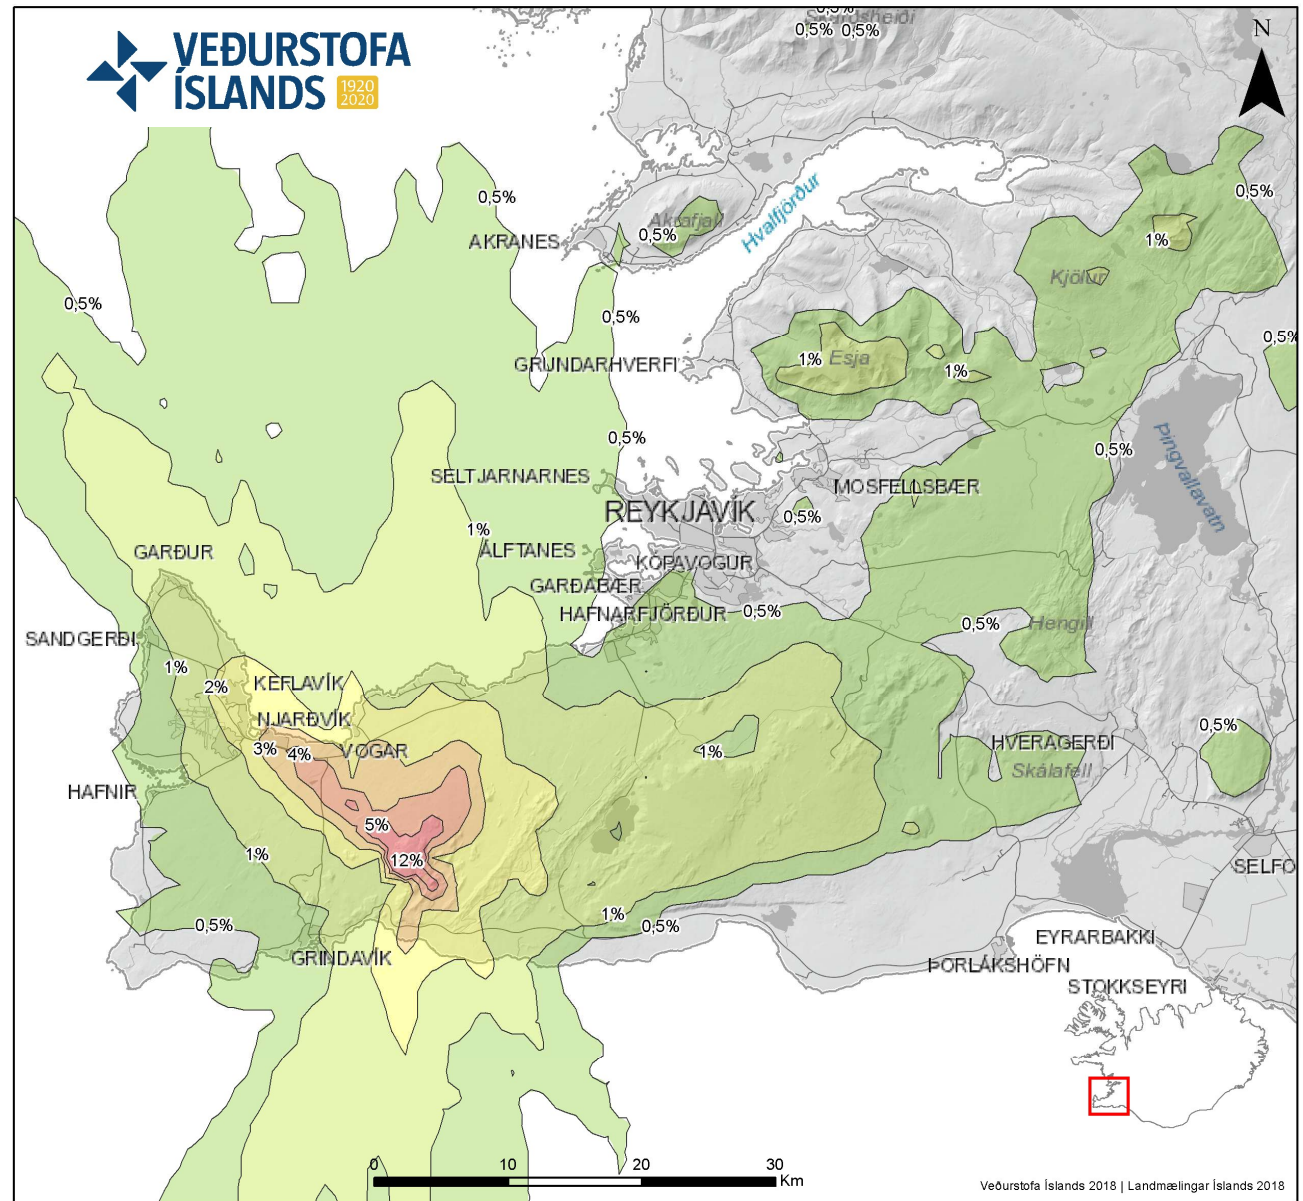

Supplement: Supplementary file 1 [file Figure_S3.pdf › Supplement/Figure_S3.pdf]
