# Supplementary material for: Fine-scale fluctuations of PM 1 , PM 2.5 , PM 10 and SO 2 concentrations caused by a prolonged volcanic eruption (Fagradalsfjall 2021, Iceland)
Source: Copernicus journal article supplement (doi:10.5194/acp-26-313-2026), 2026-01-07
Supplement: Supplementary file [file acp-26-313-2026-supplement-title-page.pdf › acp-26-313-2026-supplement-title-page.pdf]

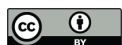

*Supplement of*

**Fine-scale fluctuations of PM<sub>1</sub>, PM<sub>2.5</sub>, PM<sub>10</sub> and SO<sub>2</sub> concentrations caused by a prolonged volcanic eruption (Fagradalsfjall 2021, Iceland)**

**Rachel C. W. Whitty et al.**

*Correspondence to:* Evgenia Ilyinskaya (e.ilyinskaya@leeds.ac.uk)

- acp-26-313-2026-supplement-title-page.pdf
- Supplement
  - Figure\_S1.gif
  - Figure\_S2.gif
  - Figure\_S3.pdf
  - Supplementary\_figures\_captions.docx
  - Table\_S1.xlsx

The copyright of individual parts of the supplement might differ from the article licence.
